# Supplementary material
Source: HighWire-hosted journal article supplement (https://jnis.bmj.com/highwire/filestream/174805/field_highwire_adjunct_files/0/jnis-2021-018547supp001_data_supplement.pdf)
Supplement: jnis-2021-018547supp001_data_supplement.pdf [file jnis-2021-018547supp001_data_supplement.pdf]

### Supplementary Material

**Supplementary Table 1:** Stroke process time metrics recommended by the Society of Neurointerventional Surgery Standards and Guidelines Committee<sup>1</sup>

|                                        |                                        |
|----------------------------------------|----------------------------------------|
| Workflow interval                      | SNIS „ideal time“                      |
| Door to physician                      | On arrival                             |
| Door to non contrast CT/CT angiography | On arrival                             |
| Door to stroke team                    | <10 min                                |
| Door to non contrast CT interpretation | <15 min                                |
| Door to CT angiography interpretation  | <20 min (or <10 min after acquisition) |
| Door to intravenous thrombolysis       | <30 min                                |
| Door to CT perfusion/MRI (when needed) | <30 min                                |
| CSC door to puncture                   | <60 min                                |
| CSC door to recanalization             | <90 min                                |
| PSC picture to CSC puncture            | <90 min*                               |

\*Assuming direct transfer to biplane neuroangiography suite when feasible

#### Reference

- McTaggart RA, Ansari SA, Goyal M, et al. Initial hospital management of patients with emergent large vessel occlusion (ELVO): report of the standards and guidelines committee of the Society of NeuroInterventional Surgery. *J Neurointerv Surg* 2017;9(3):316-23. doi: 10.1136/neurintsurg-2015-011984 [published Online First: 2015/09/02]
